# Supplementary material for: Hematin-conjugated gelatin as an effective catalyst for preparing biological hydrogels
Source: Royal Society of Chemistry journal article supplement (doi:10.1039/d1nj01426a), 2021-01-01
Supplement: d1nj01426a1.pdf [file d1nj01426a1.pdf]

## Hematin-conjugated gelatin performing an effectively catalytic function for preparing biological hydrogel

Tan Phuoc Ton,<sup>a,b,†</sup> Van Toan Nguyen,<sup>a,c,†</sup> Phuong Doan,<sup>b</sup> Dinh Trung Nguyen,<sup>a,b</sup> Thi Phuong Nguyen,<sup>d</sup> Chan Khon Huynh,<sup>e</sup> Thi Cam Quyen Ngo,<sup>a,c</sup> Le Hang Dang,<sup>\*a,b</sup> and Ngoc Quyen Tran<sup>\*ab</sup>

<sup>a.</sup> Graduate University of Science and Technology, Vietnam Academy of Science and Technology, HCMC, Vietnam;

<sup>b.</sup> Institute of Applied Materials Science Vietnam Academy of Science and Technology, HCMC, Vietnam;

<sup>c.</sup> Institute of Fundamental and Applied Sciences, Duy Tan University, HCMC 700000, Vietnam;

<sup>d.</sup> Faculty of Chemical Technology, HCMC University of Food Industry, HCMC, Vietnam;

<sup>e.</sup> Department of Biomedical Engineering, International University, Vietnam National University - HCMC, HCMC, Vietnam;

<sup>f.</sup> NTT Hi-Tech Institute, Nguyen Tat Thanh University, HCMC, Vietnam.

<sup>†</sup> First two authors contributed equally to this study.

### Supporting materials

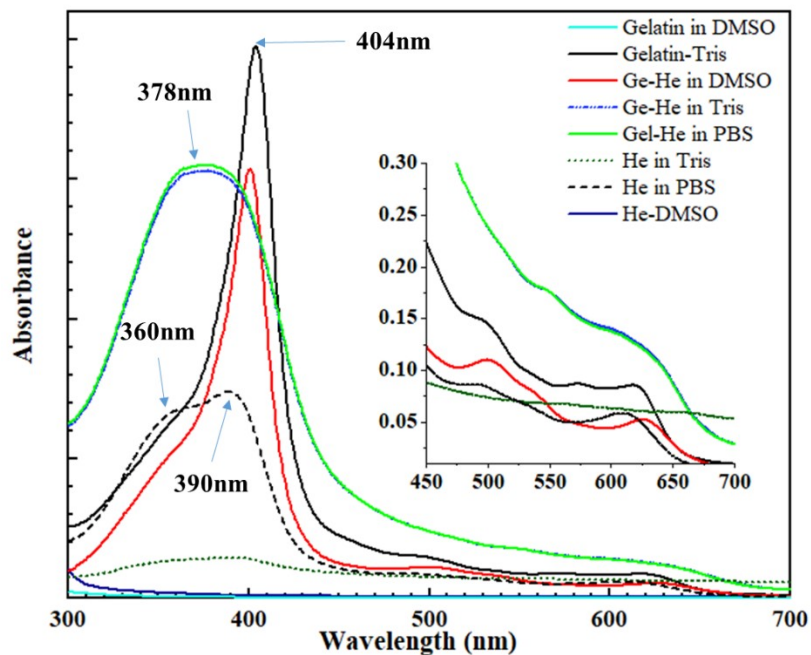

Figure S1: UV/Vis spectra of hematin (He) and Ge-He in Tris buffer (pH 8.5), PBS buffer (pH 7.4) and DMSO, [He] = 10ppm, [Ge-He] = 25ppm.
